# Supplementary material for: Non-target and suspect characterisation of organic contaminants in ambient air, Part I: Combining a novel sample clean-up method with comprehensive two-dimensional gas chromatography
Source: Copernicus journal article supplement (doi:10.5194/acp-2020-263), 2020-04-14
Supplement: Supplementary file 1 [file acp-2020-263-supplement.zip]

Archive with 2 entries (2 files):
- Excel-SI acp-2020-263.xlsx
- Supplementary material acp-2020-263.pdf
