# Supplementary material for: Non-target and suspect characterisation of organic contaminants in ambient air, Part I: Combining a novel sample clean-up method with comprehensive two-dimensional gas chromatography
Source: Copernicus journal article supplement (doi:10.5194/acp-2020-263), 2020-04-14
Supplement: Supplementary file 1 [file acp-2020-263-supplement.zip › Supplementary material acp-2020-263.pdf]

## **Used chemicals and equipment**

**Table S1: Used chemicals and equipment.**

| <b>Chemical/ Equipment</b>                                             | <b>Purchased</b>                                                   |
|------------------------------------------------------------------------|--------------------------------------------------------------------|
| Aceton                                                                 | VWR Pestinorm® for Pesticide residue analysis, VWR, Oslo, Norway   |
| <i>n</i> -Hexane                                                       | VWR Pestinorm® for Pesticide residue analysis, VWR, Oslo, Norway   |
| Cyclohexane                                                            | VWR Pestinorm® for Pesticide residue analysis, VWR, Oslo, Norway   |
| Acetonitrile                                                           | LiChrosolv, isocratic grade for LC, Merck, Darmstadt, Germany      |
| Toluene                                                                | EMSURE® for analysis, Merck, Darmstadt, Germany                    |
| Isooctane                                                              | EMSURE® for analysis, Merck, Darmstadt, Germany                    |
| Extran®                                                                | Merck, Darmstadt, Germany                                          |
| Sodium sulphate                                                        | anhydrous, EMSURE® for analysis, Merck, Darmstadt, Germany         |
| Discovery DSC-18                                                       | Supelco, Bellefonte, PA, USA                                       |
| Supel™QuE Z-Sep <sup>+</sup>                                           | Supelco, Bellefonte, PA, USA                                       |
| Florisil® 60-100 Mesh                                                  | Sigma Aldrich Chemie GmbH, Germany                                 |
| Citric acid                                                            | anhydrous, puriss., Sigma Aldrich Chemie GmbH, Germany             |
| Cotton                                                                 | Mediq Norge, Norway                                                |
| Polyurethane foam (PUF) plugs<br>(7 cm in diameter and 4 cm in height) | Sunde Skumplast A/S, Gan, Norway                                   |
| Glass fibre filters<br>(150 mm in diameter)                            | GF/C standard, Whatman®, GE Healthcare Life Sciences, Oslo, Norway |
| KNF vacuum pump                                                        | Laboport, N86KT.18, Village-Neuf, France                           |
| Nitrogen gas                                                           | 5.0 quality, Nippon gases Norge AS, Oslo, Norway                   |

All used glassware was washed with Extran®, heated to 450 °C for 8 h and rinsed with acetone prior use.

- 5 Florisil, glass fibre filters and sodium sulphate were heated to 450°C for 8 h prior use.

Cotton was Soxhlet extracted with *n*-hexane for 24h, rinsed with acetone and dried prior use.

PUF plugs were pre-cleaned by Soxhlet extraction prior use: 8 h with acetone followed by 8 h with cyclohexane.

## **Standards used for spiked surrogate method evaluation samples**

<sup>13</sup>C/<sup>2</sup>H-labeled and native standards for used for standard mixtures ‘POP’ and ‘BFR’ were purchased from Wellington

- 10 Laboratories, Guelph, ON, Canada.

Native standards for mixtures CUP A-C were purchased from AccuStandard, New Haven, CT, USA.

**Table S2: Overview of spiked compounds, recovery and RSD for method evaluation samples ‘POP’, spiked with ‘POP’.**

| Target compound               | Native/<br><sup>13</sup> C/ <sup>2</sup> H -<br>labelled | Spike<br>[ng] | POP<br>(n = 3) |         |
|-------------------------------|----------------------------------------------------------|---------------|----------------|---------|
|                               |                                                          |               | Rec [%]        | RSD [%] |
| Dieldrin                      | <sup>13</sup> C                                          | 24            | 112            | 12      |
| Aldrin                        | <sup>13</sup> C                                          | 12            | 63             | 3       |
| Endrin                        | <sup>13</sup> C                                          | 9             | 95             | 6       |
| Mirex                         | <sup>13</sup> C                                          | 15            | 92             | 2       |
| Isodrin                       | <sup>13</sup> C                                          | 46            | 74             | 4       |
| Trifluralin                   | <sup>13</sup> C                                          | 2             | 70             | 10      |
| <i>Cis</i> -Chlordane         | <sup>13</sup> C                                          | 1             | 82             | 3       |
| <i>Trans</i> -Chlordane       | <sup>13</sup> C                                          | 1             | 76             | 3       |
| Oxychlordane                  | <sup>13</sup> C                                          | 13            | 78             | 4       |
| <i>Trans</i> -nonachlor       | <sup>13</sup> C                                          | 1             | 81             | 3       |
| <i>Cis</i> -nonachlor         | <sup>13</sup> C                                          | 1             | 81             | 2       |
| Heptachlor                    | <sup>13</sup> C                                          | 14            | 67             | 4       |
| Heptachlor <i>exo</i> epoxide | <sup>13</sup> C                                          | 16            | 81             | 4       |
| Endosulfan sulphate           | <sup>13</sup> C                                          | 1             | 117            | 5       |
| Endosulfan I                  | <sup>13</sup> C                                          | 2             | 90             | 5       |
| Endosulfan II                 | <sup>13</sup> C                                          | 3             | 105            | 5       |
| $\alpha$ -HCH                 | <sup>13</sup> C                                          | 20            | 96             | 4       |
| $\beta$ -HCH                  | <sup>13</sup> C                                          | 4             | 48             | 17      |
| $\gamma$ -HCH                 | <sup>13</sup> C                                          | 20            | 91             | 3       |
| <i>p,p'</i> -DDE              | <sup>13</sup> C                                          | 6             | 59             | 4       |
| <i>o,p'</i> -DDD              | <sup>13</sup> C                                          | 6             | 78             | 4       |
| <i>p,p'</i> -DDT              | <sup>13</sup> C                                          | 7             | 83             | 10      |
| $\delta$ -HCH                 | <sup>13</sup> C                                          | 9             | 65             | 8       |
| PCB-28                        | <sup>13</sup> C                                          | 5             | 80             | 4       |
| PCB-52                        | <sup>13</sup> C                                          | 5             | 91             | 3       |
| PCB-101                       | <sup>13</sup> C                                          | 5             | 68             | 3       |
| PCB-105                       | <sup>13</sup> C                                          | 5             | 62             | 3       |
| PCB-114                       | <sup>13</sup> C                                          | 5             | 63             | 3       |
| PCB-118                       | <sup>13</sup> C                                          | 5             | 62             | 4       |
| PCB-123                       | <sup>13</sup> C                                          | 5             | 64             | 3       |
| PCB-138                       | <sup>13</sup> C                                          | 5             | 59             | 3       |
| PCB-153                       | <sup>13</sup> C                                          | 5             | 65             | 3       |
| PCB-156                       | <sup>13</sup> C                                          | 5             | 57             | 3       |
| PCB-157                       | <sup>13</sup> C                                          | 5             | 57             | 4       |
| PCB-167                       | <sup>13</sup> C                                          | 5             | 63             | 4       |
| PCB-180                       | <sup>13</sup> C                                          | 5             | 61             | 2       |
| PCB-189                       | <sup>13</sup> C                                          | 5             | 55             | 11      |
| PCB-209                       | <sup>13</sup> C                                          | 5             | 55             | 4       |
| HCB                           | <sup>13</sup> C                                          | 2             | 83             | 5       |
| PeCB                          | <sup>13</sup> C                                          | 2             | 58             | 6       |

**Table S3: Overview of spiked compounds, recovery and RSD for method evaluation samples ‘Brominated’, spiked with ‘BFR’.**

| Target compound | Native/<br><sup>13</sup> C/ <sup>2</sup> H -<br>labelled | Spike<br>[ng] | Brominated,<br>BFR<br>( <i>n</i> = 3) |            |
|-----------------|----------------------------------------------------------|---------------|---------------------------------------|------------|
|                 |                                                          |               | Rec<br>[%]                            | RSD<br>[%] |
| PBDE-28         | <sup>13</sup> C                                          | 5             | 48                                    | 11         |
| PBDE-99         | <sup>13</sup> C                                          | 5             | 59                                    | 16         |
| PBDE-47         | <sup>13</sup> C                                          | 5             | 62                                    | 4          |
| PBDE-153        | <sup>13</sup> C                                          | 5             | 85                                    | 4          |
| PBDE-197        | <sup>13</sup> C                                          | 5             | 92                                    | 11         |
| PBDE-183        | <sup>13</sup> C                                          | 5             | 92                                    | 7          |
| EHTBB           | <sup>2</sup> H                                           | 2             | 46                                    | 14         |
| γ/δ-TBECH       | native                                                   | 48            | 57                                    | 6          |
| PBBZ            | <sup>13</sup> C                                          | 2             | 60                                    | 2          |
| BTBPE           | <sup>13</sup> C                                          | 2             | 60                                    | 7          |
| α-TBECH         | native                                                   | 25            | 63                                    | 12         |
| β-TBECH         | native                                                   | 25            | 61                                    | 10         |
| TBP-AE (ATE)    | native                                                   | 49            | 62                                    | 9          |
| BEHTBP          | native                                                   | 98            | 70                                    | 25         |
| DPTE            | native                                                   | 49            | 74                                    | 5          |
| BATE            | native                                                   | 50            | 74                                    | 4          |
| PBEB            | native                                                   | 49            | 81                                    | 5          |
| PBT             | native                                                   | 49            | 82                                    | 5          |
| HBB             | <sup>13</sup> C                                          | 2             | 80                                    | 3          |

**Table S4: Overview of spiked compounds, recovery and RSD for method evaluation samples CUP A, spiked with ‘Mix 1’.**

| Target compound                                 | Native/<br><sup>13</sup> C/ <sup>2</sup> H -<br>labelled | Spike<br>[ng] | CUP A, Mix 1<br>(n = 3) |                  |
|-------------------------------------------------|----------------------------------------------------------|---------------|-------------------------|------------------|
|                                                 |                                                          |               | Rec [%]                 | RSD [%]          |
| Alachlor                                        | native                                                   | 50            | 90                      | 13               |
| Atrazine                                        | native                                                   | 1012          | 50                      | 5                |
| Bromacil                                        | native                                                   | 51            | 14                      | 46               |
| Carbophenothion                                 | native                                                   | 50            | 129                     | 16               |
| <i>Cis</i> -chlordane ( $\alpha$ -Chlordan)     | native                                                   | 51            | 108                     | 5                |
| <i>Trans</i> -chlordane ( $\gamma$ -Chlordan)   | native                                                   | 51            | 109                     | 5                |
| Chloroneb                                       | native                                                   | 50            | 19                      | 10               |
| Chlorothalonil                                  | native                                                   | 50            | 46 <sup>a</sup>         | 141 <sup>a</sup> |
| Chlorpyrifos                                    | native                                                   | 100           | 88                      | 18               |
| Chlorpyrifos-methyl                             | native                                                   | 98            | 59                      | 15               |
| Chlorthal-dimethyl (Dacthal or DCPA)            | native                                                   | 51            | 78                      | 3                |
| <i>cis</i> -Permethrin                          | native                                                   | 40            | 169                     | 8                |
| Cyanazine                                       | native                                                   | 152           | 86                      | 27               |
| Diazinon (Dimpylate)                            | native                                                   | 50            | 50                      | 14               |
| Dieldrin                                        | native                                                   | 49            | 103                     | 3                |
| Endine                                          | native                                                   | 10            | 131                     | 12               |
| Endrin ketone                                   | native                                                   | 10            | 139                     | 5                |
| Ethion                                          | native                                                   | 98            | 261                     | 21               |
| Fenitrothion                                    | native                                                   | 99            | 98                      | 13               |
| Heptachlor <i>exo</i> -epoxide                  | native                                                   | 5             | 104                     | 6                |
| Malathion                                       | native                                                   | 50            | 108                     | 14               |
| Methidathion                                    | native                                                   | 49            | 200                     | 21               |
| Methoxychlor                                    | native                                                   | 25            | 103                     | 10               |
| Metolachlor                                     | native                                                   | 50            | 127                     | 16               |
| Metribuzin                                      | native                                                   | 25            | 79                      | 18               |
| <i>p,p'</i> -DDT                                | native                                                   | 49            | 110                     | 5                |
| Pentachloronitrobenzene<br>(PCNB or Quintozene) | native                                                   | 49            | 41                      | 0                |
| Phosalone                                       | native                                                   | 99            | 103                     | 11               |
| Pirimiphos-methyl                               | native                                                   | 48            | 26                      | 23               |
| Propachlor                                      | native                                                   | 51            | 32                      | 6                |
| Simazine                                        | native                                                   | 1019          | 56                      | 9                |
| Tecnazene (TCNB)                                | native                                                   | 49            | 29                      | 4                |
| 2,3,5,6-Tetrachloronitrobenzene                 | native                                                   | 59            | 157                     | 15               |
| <i>trans</i> -Permethrin                        | native                                                   | 55            | 51                      | 6                |
| Trifluralin                                     | native                                                   | 49            | 0                       | -                |
| Chlorfenvinphos                                 | native                                                   | 51            | 0                       | -                |
| Chlorobenzilate                                 | native                                                   | 99            | 0                       | -                |
| Dichlorvos                                      | native                                                   | 10            | 0                       | -                |
| Endine aldehyde                                 | native                                                   | 51            | 0                       | -                |
| Etridiazole                                     | native                                                   |               |                         |                  |

<sup>a</sup>: This recovery is not sure, 2 samples with no recovery and one sample with 139 % recovery

**Table S5: Overview of spiked compounds, recovery and RSD for method evaluation samples ‘CUP B’ and ‘CUP C’, spiked with ‘Mix 2’ and ‘Mix 3’.**

| Target compound                                   | Native/<br><sup>13</sup> C/ <sup>2</sup> H -<br>labelled | Spike<br>[ng] | CUP B, Mix 2 |            | CUP C, Mix 3 |            |
|---------------------------------------------------|----------------------------------------------------------|---------------|--------------|------------|--------------|------------|
|                                                   |                                                          |               | (n = 3)      |            | (n = 3)      |            |
|                                                   |                                                          |               | Rec<br>[%]   | RSD<br>[%] | Rec<br>[%]   | RSD<br>[%] |
| Octachlorostyrene                                 | native                                                   | 46            | 43           | 9          | -            | -          |
| 2,3,5,6-Tetrabromo- <i>p</i> -xylene              | native                                                   | 52            | 64           | 16         | -            | -          |
| Musk ketone                                       | native                                                   | 81            | 83           | 58         | -            | -          |
| Musk xylene                                       | native                                                   | 44            | 44           | 3          | -            | -          |
| Tonalide                                          | native                                                   | 50            | 29           | 18         | -            | -          |
| Galaxolid                                         | native                                                   | 20            | -            | -          | 27           | 8          |
| 1,2,3,5,8-Pentachloronaphthalene<br>(PCN 53)      | native                                                   | 20            | -            | -          | 110          | 8          |
| 1,2,3,5,6,7-Hexachloronaphthalene<br>(PCN 67)     | native                                                   | 19            | -            | -          | 135          | 8          |
| 1,2,3,4,5,6,7-Heptachloronaphthalene<br>(PCN 73)  | native                                                   | 20            | -            | -          | 155          | 5          |
| 1,2,3,4,5,6,7,8-Octachloronaphthalene<br>(PCN 75) | native                                                   | 20            | -            | -          | 120          | 51         |

**Standards used for real high-volume air samples**

Internal standards were used for method quality control.

<sup>13</sup>C-labeled standards were purchased from Wellington Laboratories, Guelph, ON, Canada.

<sup>2</sup>H<sub>10</sub>-labeled phenanthrene was purchased from Chiron AS, Trondheim, Norway.

5    1,2,3,4-Tetrachloronaphthalene was purchased from Ultra-Scientific, North Kingstown, RI, USA.

**Table S6: Spiking amounts ISTDs for real high-volume samples.**

| Internal standard                              | Spiking amount [ng] |
|------------------------------------------------|---------------------|
| <sup>2</sup> H <sub>10</sub> phenanthrene      | 2.08                |
| <sup>13</sup> C <sub>6</sub> HCB               | 4.78                |
| <sup>13</sup> C <sub>12</sub> <i>p,p'</i> -DDT | 16.12               |
| <sup>13</sup> C <sub>12</sub> PCB-153          | 12,20               |
| <sup>13</sup> C <sub>6</sub> HBB               | 21.14               |
| <sup>13</sup> C <sub>12</sub> PBDE-28          | 5.28                |
| <sup>13</sup> C <sub>12</sub> PBDE-47          | 5.22                |
| <sup>13</sup> C <sub>12</sub> PBDE-99          | 5.30                |
| Recovery standard                              |                     |
| 1,2,3,4-Tetrachloronaphthalene (TCN)           | 7.96                |

**GCxGC-LRMS analysis**

Three microlitre (μL) of each extract was injected into a PTV (programmed temperature vaporiser) inlet, operating in solvent  
10    vent mode.

PTV solvent vent mode with 30 sec solvent vent time, 50 mL min<sup>-1</sup> solvent vent flow at 0 psi, with a Gerstel PTV injector. Initial inlet temperature was 50 °C with a duration of 0.55 min, ramped with 200 °C min<sup>-1</sup> to 280 °C with a duration of 6 min and ramped with 100 °C min<sup>-1</sup> to 320 °C with a duration of 2 min.

The temperature program of the primary GC column was set as follows: 45 °C (hold time 0.55 min), ramped with 50 °C min<sup>-1</sup>  
15    to 80 °C (hold time 1.5 min) and ramped with 4 °C min<sup>-1</sup> to 300 °C (hold time 8 min). The secondary oven temperature was programmed 105 °C (hold time 2.25 min) and ramped at 4 °C min<sup>-1</sup> to 315 °C (hold time 10.5 min). Modulation period was set to 4.5 s with 0.54 s hot pulse time and 19 °C modulator temperature offset relative to the primary oven temperature. Liquid N<sub>2</sub> (Nippon gases Norge AS, Oslo, Norway) was used as coolant for the GCxGC modulator. The ion source and the transfer line temperatures were set to 200 °C and 300 °C, respectively and the MS was operated in electron ionisation (EI) mode with  
20    an electron energy of 70 eV. A data acquisition rate of 100 spectra s<sup>-1</sup> was used in combination with an acquired mass range

of  $m/z$  (mass to charge ratio) 45 – 1000. Autotuning was performed by using the  $m/z$  219 perfluorotributylamine (PFTBA) ion instead of the default  $m/z$  69 ion. In order to avoid system contamination and memory effects, clean solvent (Toluene followed by Acetonitrile) was injected after each sample run.

#### **Data alignment for suspect lists, which MS are to find in NIST 14/customised self-build libraries and how to highlight findings of suspects in peak lists**

This study applied pre-defined suspect lists with components relevant as potential Arctic atmospheric contaminants (Reppas-Chrysovitinos et al., 2017; Brown and Wania, 2008; Coscollà et al., 2011; Hoferkamp et al., 2010; Howard and Muir, 2010; NORMAN-network, 2019).

In order to account for different CAS numbers and/or different names of compounds in the used suspect lists and available MS libraries, compound names from the suspect lists were transformed to CAS numbers and compared to the original CAS number in the suspect list. In case the transformed CAS number derived for the respective original CAS number stated in the chosen publications, a manual search was performed in SciFinder to identify the correct CAS number for a compound. After all compounds were assigned with corrected CAS numbers, SMILES strings were created of each compound, using JChem for Excel (ChemAxon, 2019).

Conditional formatting in Excel was used to create a merged suspect list, including the information from which list a suspect is originating (e.g. AMAP list or NORMAN list etc.).

To identify which of those suspects might be listed in the used MS libraries, all entries of the used MS libraries were exported to Excel (Name, CAS and molecular formula).

With conditional formatting in Excel, all suspects, of which a MS is available in the used MS libraries, were highlighted and copied to a separate column.

The mass spectra of these suspects were manually copied from the used MS libraries to a separate, customised self-build library.

This customised MS library, containing the selected mass spectra, was used beside other self-build MS libraries for suspect screening. During suspect screening, the first library search was only performed with self-build libraries. Here all peak markers in ChromaTOF were highlighted as suspects before further data processing and classification. The final peak list, L0–L2 compounds, was cross checked with the initial suspect list and the origin list of a suspect was included.

**Table S7: Summary of PBT criteria.**

|                                                      | <b>REACH (European Parliament, 2018)</b>                                                                                                                                                                                                                                                                             | <b>Stockholm convention (UNEP, 2009)</b>                                                                                                                                                                                                    |
|------------------------------------------------------|----------------------------------------------------------------------------------------------------------------------------------------------------------------------------------------------------------------------------------------------------------------------------------------------------------------------|---------------------------------------------------------------------------------------------------------------------------------------------------------------------------------------------------------------------------------------------|
| <b>Persistent (P)</b>                                | $t_{1/2}$ water fresh/marine $\geq 960/1440$ h (40/60 days)<br>(vP <sup>1</sup> $\geq 1440$ h (60 days))<br>$t_{1/2}$ soil $\geq 2880$ h (120 days)<br>(vP <sup>1</sup> $\geq 4320$ h (180 days))<br>$t_{1/2}$ sediment fresh/marine $\geq 2880/4320$ h (120/180 days)<br>(vP <sup>1</sup> $\geq 4320$ h (180 days)) | $t_{1/2}$ water $\geq 2$ months (1440 h)<br><br>$t_{1/2}$ soil $\geq 6$ months (2880 h)<br><br>$t_{1/2}$ sediment $\geq 6$ months (2880 h)                                                                                                  |
| <b>Bioaccumulative (B)</b>                           | BCF <sup>2</sup> $\geq 2000$ (vB <sup>3</sup> $\geq 5000$ )                                                                                                                                                                                                                                                          | BCF <sup>2</sup> $\geq 5000$                                                                                                                                                                                                                |
| <b>Toxic (T)</b>                                     | NOEL or EC10 $\leq 0.01$ mg/ L<br>Or Carcinogen 1A, 1B or 2<br>Or mutagenic 1A or 1B<br>Or reproduction toxic 1A, 1B or 2<br>Or evidence for chron. Tox. STORE cat. 1 or 2                                                                                                                                           | Evidence of adverse effects to human health, or<br>toxicity or ecotox. indicate potential damage to<br>human health or the environment                                                                                                      |
| <b>Long-range<br/>transport potential<br/>(LRTP)</b> | - <sup>4</sup>                                                                                                                                                                                                                                                                                                       | Measured levels in distant of source of relevance<br>Or monitoring data showing LRT with potential<br>to transfer to a receiving environment<br>Or environment fate properties/model results that<br>show LRTP: $t_{1/2}$ air $\geq 2$ days |

<sup>1</sup> vP: very persistent; <sup>2</sup> BCF: Bioconcentration factor; <sup>3</sup> vB: very bioaccumulative; <sup>4</sup> not applicable

## References

- Brown, T. N., and Wania, F.: Screening chemicals for the potential to be persistent organic pollutants: A case study of Arctic contaminants, *Environmental Science & Technology*, 42, 5202-5209, 10.1021/es8004514, 2008.
- ChemAxon: JChem for Excel Add-In V 19.25.0.559. 2019.
- 5 Coscollà, C., Castillo, M., Pastor, A., and Yusà, V.: Determination of 40 currently used pesticides in airborne particulate matter (PM 10) by microwave-assisted extraction and gas chromatography coupled to triple quadrupole mass spectrometry, *Analytica Chimica Acta*, 693, 72-81, <http://dx.doi.org/10.1016/j.aca.2011.03.017>, 2011.
- European Parliament, C. o. t. E. U.: Regulation (EC) No 1907/2006 of the European Parliament and of the Council of 18 December 2006 concerning the Registration, Evaluation, Authorisation and Restriction of Chemicals (REACH), establishing a European Chemicals Agency, amending Directive 1999/45/EC and repealing Council Regulation (EEC) No 793/93 and Commission Regulation (EC) No 1488/94 as well as Council Directive 76/769/EEC and Commission Directives 91/155/EEC, 93/67/EEC, 93/105/EC and 2000/21/EC. 2018.
- 10 Hoferkamp, L., Hermanson, M. H., and Muir, D. C. G.: Current use pesticides in Arctic media; 2000–2007, *Science of the Total Environment*, 408, 2985-2994, <http://dx.doi.org/10.1016/j.scitotenv.2009.11.038>, 2010.
- 15 Howard, P. H., and Muir, D. C. G.: Identifying New Persistent and Bioaccumulative Organics Among Chemicals in Commerce, *Environmental Science & Technology*, 44, 2277-2285, 10.1021/es903383a, 2010.
- NORMAN-network: List of emergin substances, latest update February 2016: [https://www.norman-network.com/sites/default/files/files/Emerging\\_substances\\_list\\_Feb\\_16/NORMAN%20list\\_2016\\_FINAL.XLSX](https://www.norman-network.com/sites/default/files/files/Emerging_substances_list_Feb_16/NORMAN%20list_2016_FINAL.XLSX), access: 07.02.2020, 2019.
- 20 Reppas-Chrysovitsinos, E., Sobek, A., and MacLeod, M.: Screening-level exposure-based prioritization to identify potential POPs, vPvBs and planetary boundary threats among Arctic contaminants, *Emerging Contaminants*, 3, 85-94, <https://doi.org/10.1016/j.emcon.2017.06.001>, 2017.
- UNEP: Stockholm Convention on Persistent Organic Pollutants:
- 25 <http://www.pops.int/TheConvention/Overview/TextoftheConvention/tabid/2232/Default.aspx>, access: 04.02.2020, 2009.
